# Supplementary material
Source: PubMed Central journal article supplement (PMC10035371)
Supplement: crc-22-0170-s01.pdf [file crc-22-0170-s01.pdf]

**Figure S1**

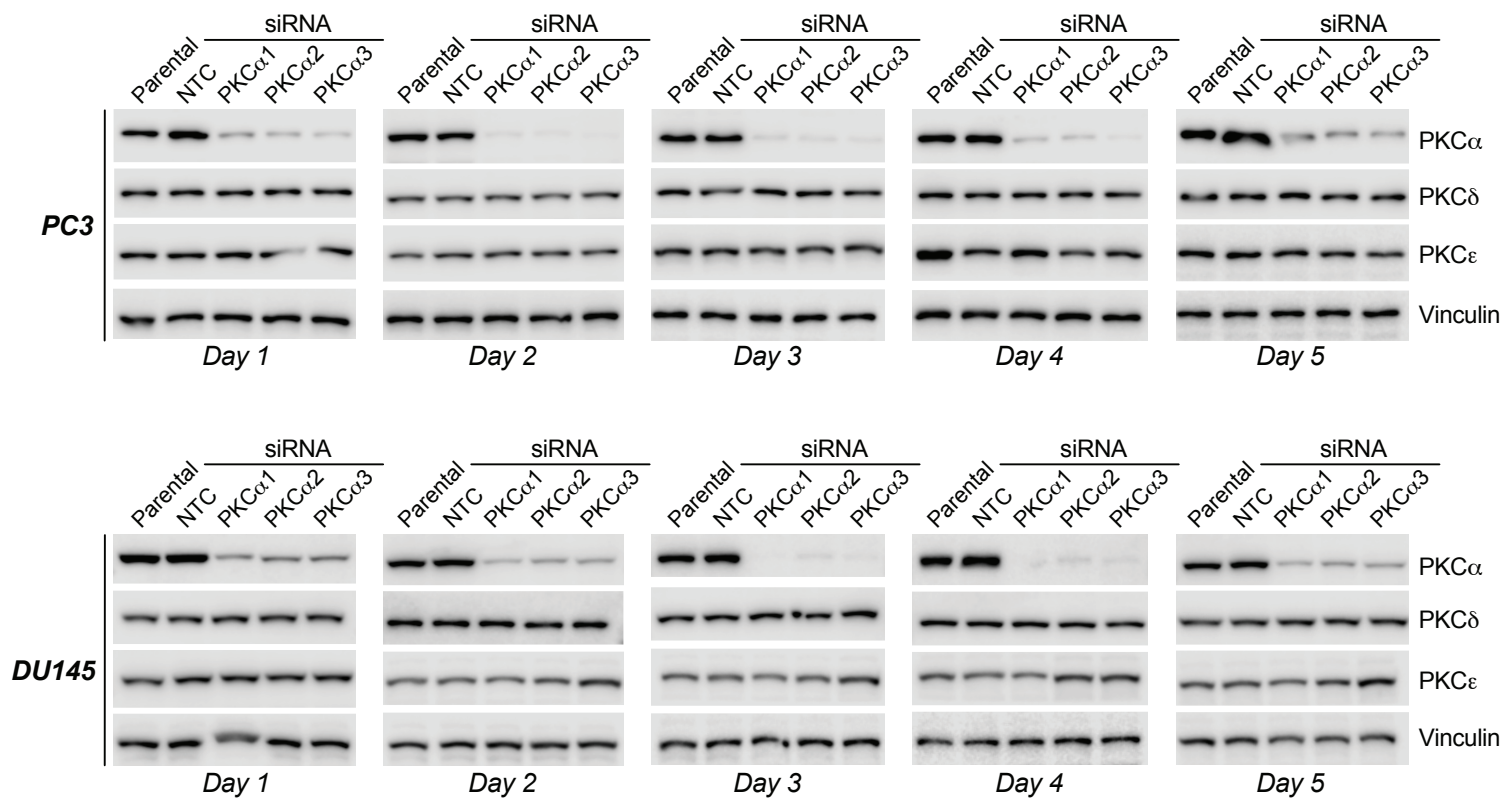

**Figure S1**

Time-dependent expression of PKC $\alpha$  in prostate cancer cells after RNAi silencing. PC3 or DU145 cells were transfected with three different PKC $\alpha$  siRNA duplexes ( $\alpha$ 1,  $\alpha$ 2 or  $\alpha$ 3 ) or non-target control (*NTC*). Twenty-four h later cells were serum starved for 24 h, and PKC $\alpha$  expression was determined at different times (1-5 days).
