# Supplementary material
Source: PubMed Central journal article supplement (PMC10035371)
Supplement: crc-22-0170-s02.pdf [file crc-22-0170-s02.pdf]

**Figure S2**

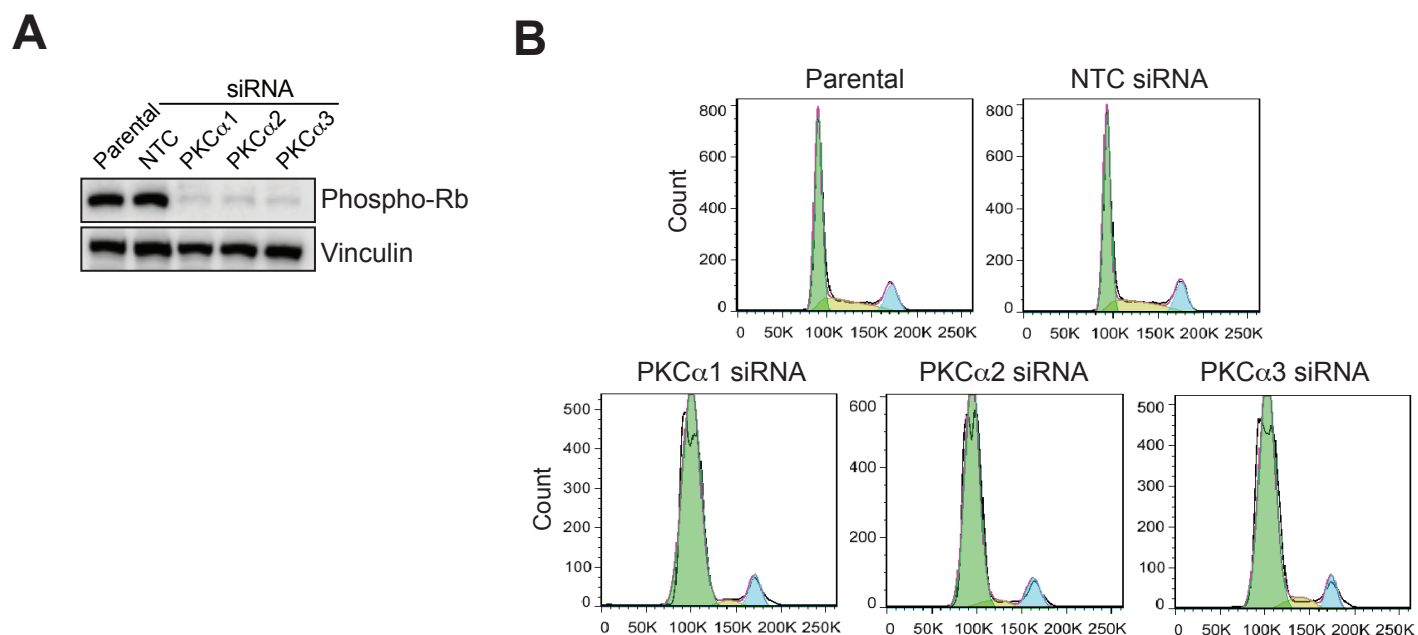

**Figure S2**

Cell cycle analysis. **A**, Rb dephosphorylation in PC3 cells subjected to PKC $\alpha$  RNAi depletion. A representative experiment is shown. **B**, Cell cycle distribution analysis by FACS in PC3 cells, 3 days after transfection with siRNA duplexes for PKC $\alpha$  or non-target control (NTC).
