# Supplementary material
Source: PubMed Central journal article supplement (PMC10035371)
Supplement: crc-22-0170-s03.pdf [file crc-22-0170-s03.pdf]

Figure S3

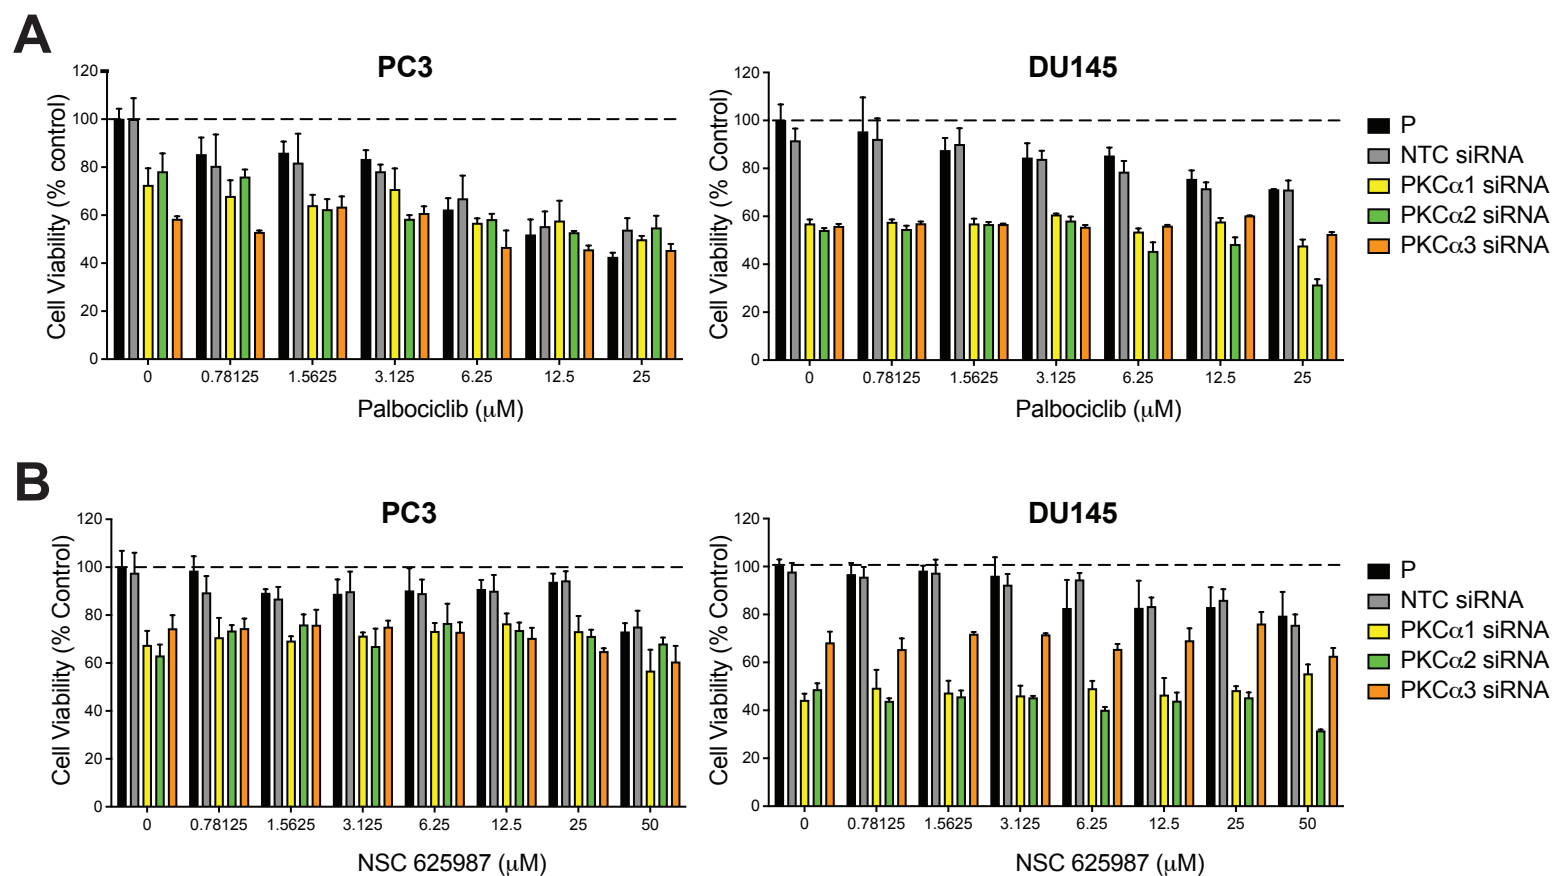

**Figure S3**

Effect of treatment with Cdk4/6 and Cdk4 inhibitors in combination with PKC $\alpha$  RNAi silencing. **A**, PC3 cells (left panel) or DU145 cells (right panel) were transfected with three different PKC $\alpha$  siRNA duplexes ( $\alpha$ 1,  $\alpha$ 2 or  $\alpha$ 3) or non-target control (NTC). After 48 h, cells were treated with different concentrations of the Cdk4/6 inhibitor palbociclib for 24 h. Cell viability was determined with the MTT assay. Results (in triplicate) relative to control (parental, non-treated cells) are expressed as mean  $\pm$  S.D. **B**, Similar experiments as in (A) but using the Cdk4 inhibitor NSC 625987.
