# Supplementary material
Source: PubMed Central journal article supplement (PMC10035371)
Supplement: crc-22-0170-s04.pdf [file crc-22-0170-s04.pdf]

**Figure S4**

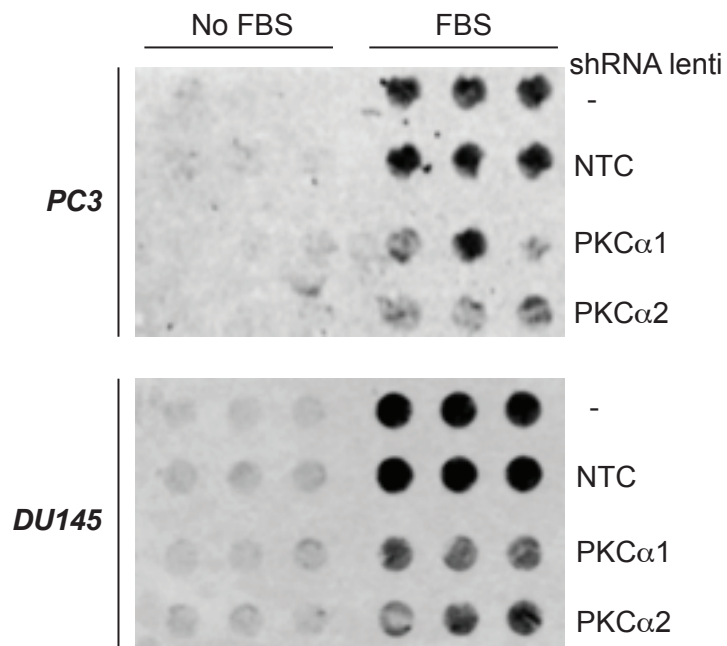

**Figure S4**

Reduced invasion in PKC $\alpha$  stably depleted prostate cancer cells. Cell invasion was determined using a Boyden chamber with Matrigel in PC3 and DU145 cells subjected to stable PKC $\alpha$  depletion with shRNA lentiviruses. Experiments were done in the absence or presence of 5% FBS in the lower chamber. *NTC*, non-target control shRNA lentivirus.
