# Supplementary material
Source: PubMed Central journal article supplement (PMC10035371)
Supplement: crc-22-0170-s05.pdf [file crc-22-0170-s05.pdf]

Figure S5

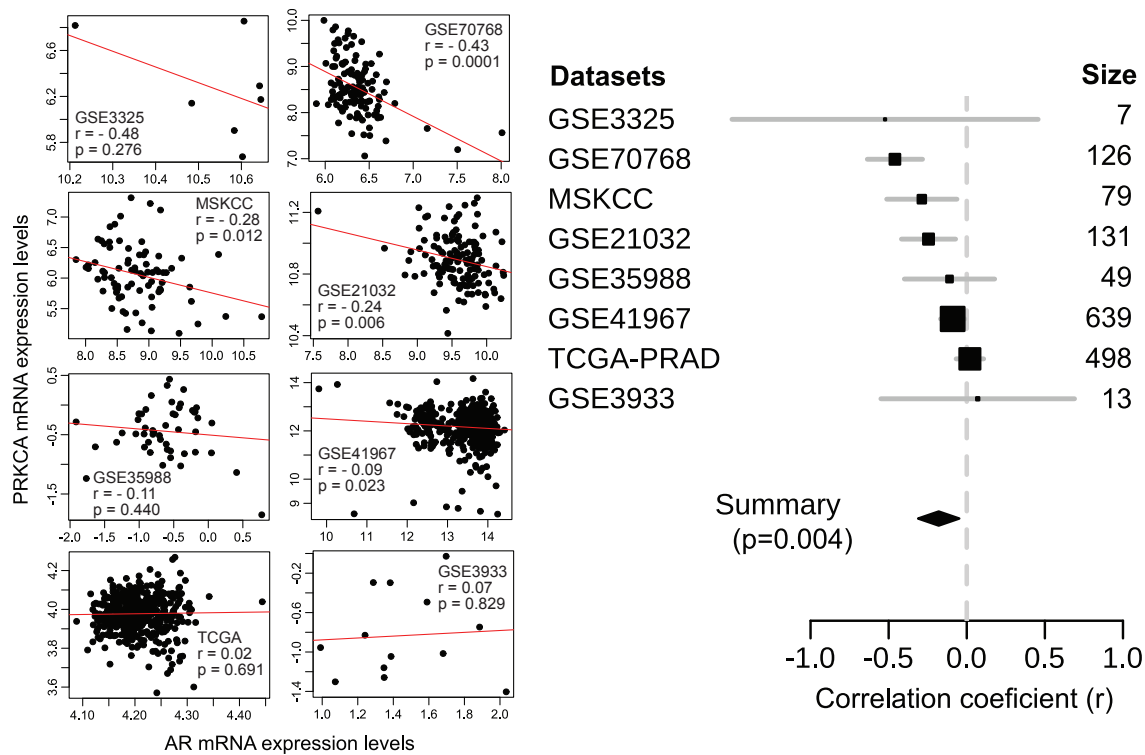

Figure S5

Relationship between *PRKCA* and *AR* expression in prostate cancer. Correlation graphs for individual datasets, including the corresponding  $r$  and  $p$  values, are displayed on the left. A meta-analysis is shown on the right.
