# Supplementary material
Source: PubMed Central journal article supplement (PMC10035371)
Supplement: crc-22-0170-s06.pdf [file crc-22-0170-s06.pdf]

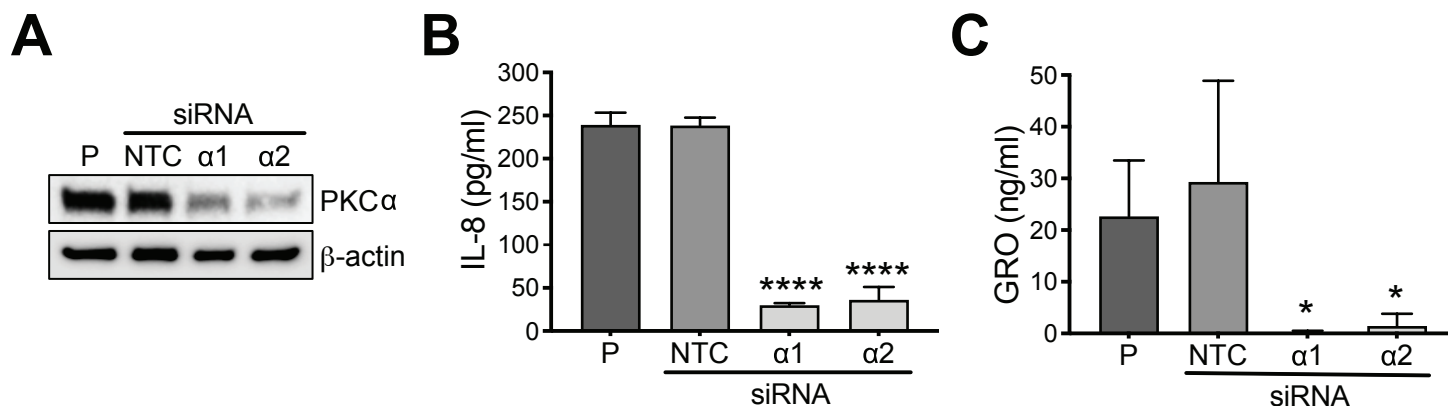

**Figure S6**

Reduced production of cytokines in PC3 cells subjected to PKC $\alpha$  RNAi depletion. PC3 cells were transfected with PKC $\alpha$  ( $\alpha 1$ ,  $\alpha 2$ ) or non-target control (*NTC*) siRNA duplexes. After 48 h, medium was replaced, and conditioned medium (*CM*) was collected after 12 h (IL-8/CXCL8) or 24 h (GRO). Cytokines in the *CM* were determined by ELISA. \*,  $p < 0.05$  vs. *NTC*; \*\*\*\*,  $p < 0.0001$  vs. *NTC*. **A**, Expression of PKC $\alpha$  by Western blot. **B**, Cytokine determination by ELISA. A representative experiment is shown, with data expressed as mean  $\pm$  S.D. ( $n=4$ ). *P*, parental.
